# Supplementary material
Source: HighWire-hosted journal article supplement (https://spcare.bmj.com/content/13/e3/e843)
Supplement: inline-supplementary-material-1 [file inline-supplementary-material-1.pdf]

Supplementary Table 1: Demographic and baseline data

| Variables                             | Participants<br><i>n</i> =24 |
|---------------------------------------|------------------------------|
| Gender                                |                              |
| Male                                  | 12 (50)                      |
| Female                                | 12 (50)                      |
| Age                                   |                              |
| Under 55                              | 6 (25)                       |
| 55-64                                 | 4 (16.7)                     |
| 65 and over                           | 14 (58.3)                    |
| Current Place of Care                 |                              |
| Private residence                     | 22 (91.7)                    |
| Inpatient Oncology or Palliative ward | 3 (12.5)                     |
| Married/living with partner           |                              |
| Yes                                   | 12 (50.0)                    |
| No                                    | 12 (50.0)                    |
| Other, live in social support         |                              |
| Yes                                   | 15 (62.5)                    |
| No                                    | 9 (37.5)                     |
| Community Support                     |                              |
| None                                  | 10 (41.7)                    |
| General Nursing                       | 2 (8.3)                      |
| Palliative Care                       | 6 (25)                       |
| Domestic                              | 6 (25)                       |
| Other                                 | 2 (8.3)                      |
| Mobility aid use                      |                              |
| None                                  | 13 (54.2)                    |
| Walking Stick                         | 6 (25)                       |
| 4 Wheeled Walker                      | 4 (16.7)                     |
| Other                                 | 1 (4.2)                      |
| Transport to clinic                   |                              |
| Drives self                           | 5 (20.8)                     |
| Driven by someone                     | 18 (75)                      |
| Public transport                      | 3 (12.5)                     |
| Other                                 | 1 (4.2)                      |
| Metastatic disease                    |                              |
| Yes                                   | 21 (87.5)                    |
| No                                    | 3 (12.5)                     |
| Primary cancer                        |                              |
| Prostate                              | 5 (20.8)                     |
| Breast                                | 5 (20.8)                     |
| Lung                                  | 4 (16.7)                     |
| Gastro-intestinal                     | 4 (16.7)                     |
| Melanoma                              | 2 (8.3)                      |
| Urological                            | 1 (4.2)                      |
| Gynaecological                        | 1 (4.2)                      |
| Other                                 | 2 (8.3)                      |
| Current Treatment                     |                              |
| None                                  | 6 (25.0)                     |
| Chemotherapy                          | 10 (41.7)                    |

|                                                                |                    |
|----------------------------------------------------------------|--------------------|
| Hormone therapy                                                | 7 (29.2)           |
| Bone strengthening                                             | 5 (20.8)           |
| Immunotherapy                                                  | 3 (12.5)           |
| Number of medications, median (range)                          | 11.5 (3-18)        |
| Number of medications, mean (range)                            | 11.23 (3-18)       |
| Oral morphine equivalent dose in past 24 hours, median (range) | 90mg (6-500mg)     |
| Oral morphine equivalent dose in past 24 hours, mean (range)   | 122.29mg (6-500mg) |
| Use of other analgesia in past 24 hours (percentage)           | 75.0               |
| HADS score, median (range)                                     | 13.45 (3-24)       |
| Anxiety, median (range)                                        | 6.37 (0-12)        |
| Depression, median (range)                                     | 7.08 (2-12)        |
| Average pain score on day 1, median (range)                    | 4.25 (2-9)         |

---

Data is presented as number (percentage) unless otherwise indicated.
